# Supplementary material
Source: HighWire-hosted journal article supplement (https://bmjopen.bmj.com/content/7/6/e013211)
Supplement: inline-supplementary-material-1 [file inline-supplementary-material-1.pdf]

## Supplementary Tables

**Table 1.** CVs of Differences Values of test and retest result of VCA-IgA kits and the EBNA1-IgA kit

| Kits      | CV   |
|-----------|------|
| VCA-IgA   |      |
| BB        | 0.69 |
| BNV       | 0.65 |
| GBI       | 1.00 |
| HA        | 0.34 |
| HK        | 1.55 |
| KSB       | 0.86 |
| ZS        | 1.24 |
| Euroimmun | 0.63 |
| EBNA1-IgA | 0.55 |

**Table 2.** Sensitivities and Specificities based on manufacturers' cutoffs of VCA-IgA kits and the EBNA1-IgA kit

| Kits      | Sensitivity (%) (95% CI) |                         |                  | Specificity (%) (95% CI) |
|-----------|--------------------------|-------------------------|------------------|--------------------------|
|           | Early stage (95% CI)     | Advanced stage (95% CI) | Total (95% CI)   |                          |
| VCA-IgA   |                          |                         |                  |                          |
| BB        | 69.7(51.0-84.0)          | 85.6(80.8-90.5)         | 83.0 (77.8-88.2) | 94.5 (91.3-97.7)         |
| BNV       | 72.7(54.0-87.0)          | 86.8(82.1-91.5)         | 84.5 (79.5-89.5) | 94.0 (90.7-97.3)         |
| GBI       | 69.7(51.0-84.0)          | 71.9(65.6-78.1)         | 71.5 (65.2-77.8) | 93.0 (89.5-96.5)         |
| HA        | 90.9(76.0-98.0)          | 85.6(80.8-90.5)         | 86.5 (81.8-91.2) | 87.0 (82.3-91.7)         |
| HK        | 84.8(68.0-95.0)          | 85.0(80.1-90.0)         | 85.0 (80.1-89.9) | 85.5 (80.6-90.4)         |
| KSB       | 81.8(64.0-93.0)          | 77.2(71.4-83.1)         | 78.0 (72.3-83.7) | 92.5 (88.8-96.2)         |
| ZS        | 57.6(39.0-74.0)          | 59.3(52.5-66.1)         | 59.0 (52.2-65.8) | 95.5 (92.6-98.4)         |
| Euroimmun | 97.0(85.0-100.0)         | 90.4(86.3-94.5)         | 91.5 (87.6-95.4) | 79.5 (73.9-85.1)         |
| EBNA1-IgA | 93.9(80.0-99.0)          | 88.6(84.2-93.0)         | 89.5 (84.7-93.3) | 90.0 (85.8-94.2)         |
